# Supplementary material
Source: Springer Nature journal article supplement (https://www.springermedizin.de/resource/supplementary/12889_2008_1698_MOESM1_ESM.pdf/9503754)

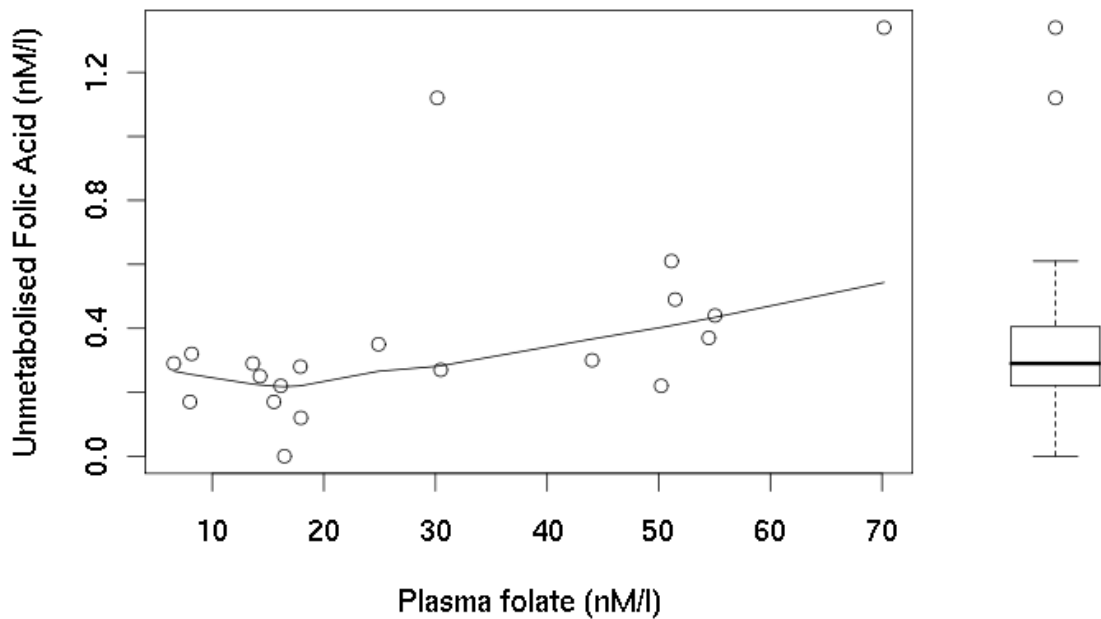

( $p = 0.007$ ,  $r^2 = 0.300$ )

Supplement: MOESM1 [file 9503754]
